# Supplementary material for: Different spatial orientations of amide derivatives on anion coordination
Source: Royal Society of Chemistry journal article supplement (doi:10.1039/b915230j), 2010-01-01
Supplement: b915230j.pdf [file b915230j.pdf]

**Supplementary materials:**

**Different spatial orientations of amide derivatives on anion coordination**

D.Kalita and J.B.Baruah

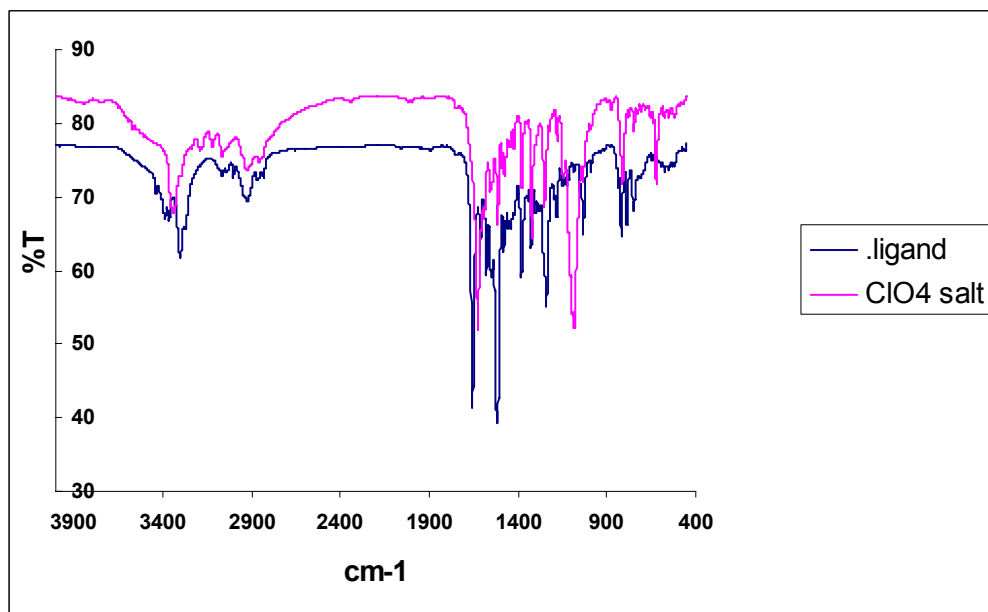

The IR (KBr,  $\text{cm}^{-1}$ ) of N-(4-methoxyphenethyl)-2-(quinolin-8-ylamino)acetamide) (blue) and its perchlorate salt (violet)

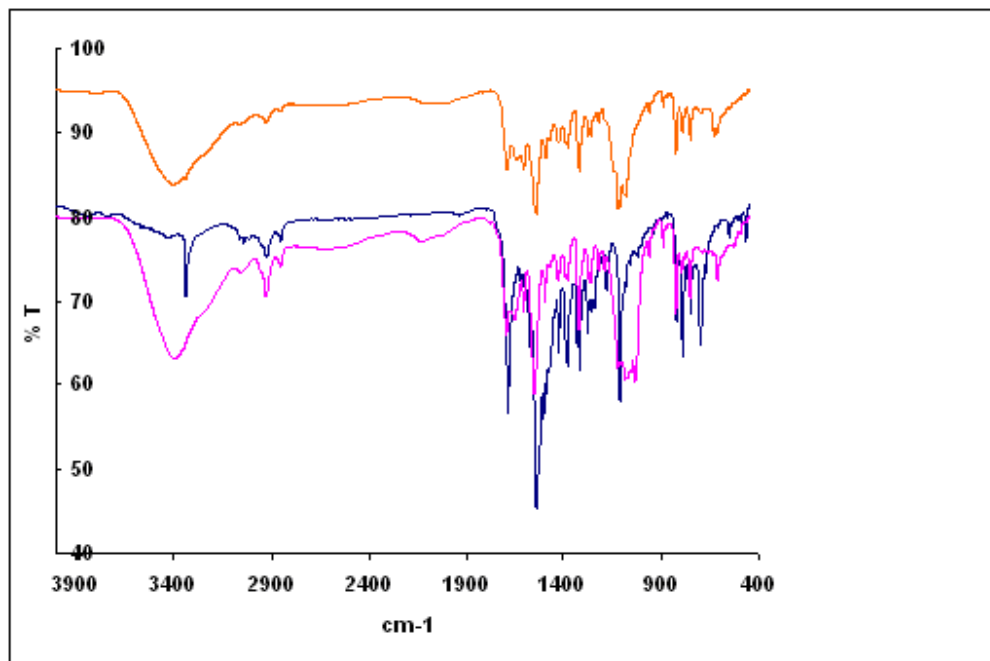

The IR (KBr, cm<sup>-1</sup>) of [N-(quinolin-8-yl)-2-(quinolin-8-yloxy)acetamide] (orange color) and its perchlorate salt **IV** (violet) and tetrafluoroborate salt **V** (Blue)

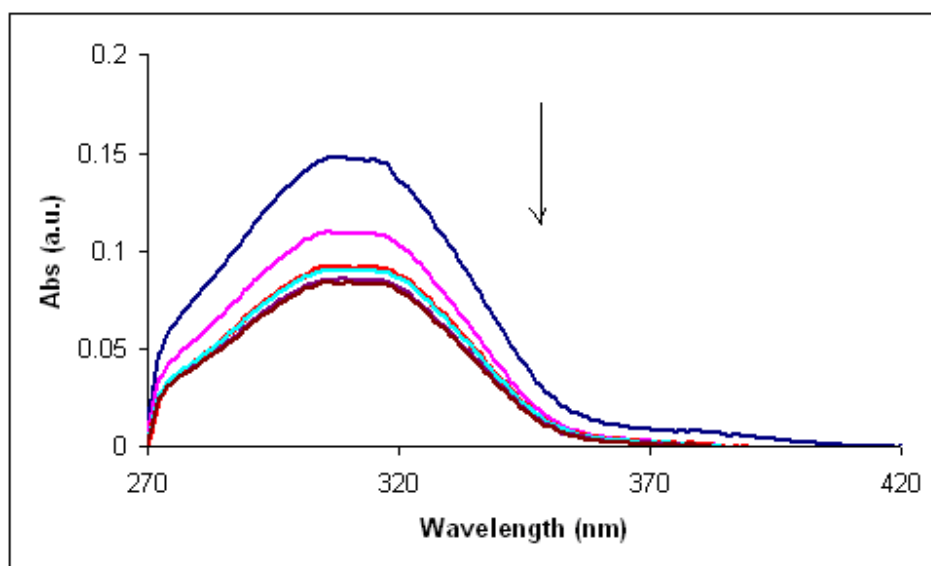

Decrease in absorbance in UV-spectra of a DMF solution of [N-(quinolin-8-yl)-2-(quinolin-8-yloxy)acetamide] on addition of solid sodium tetrafluoroborate

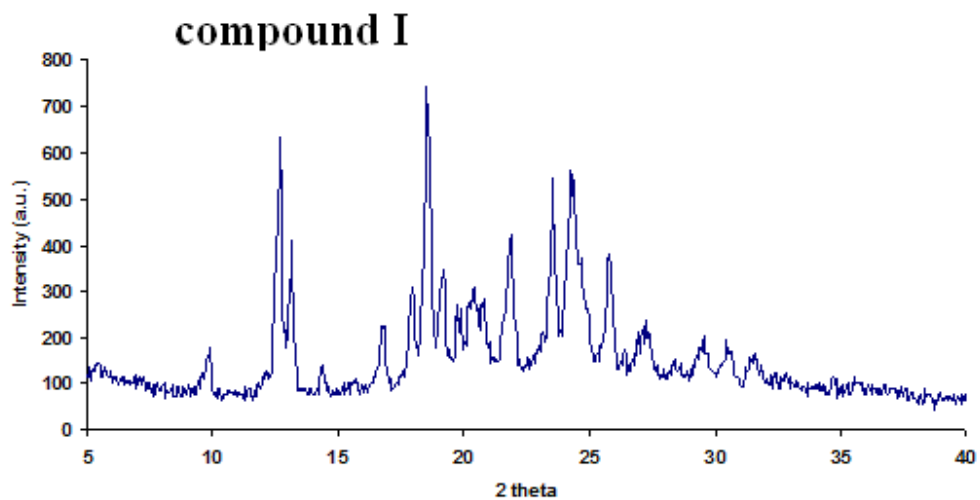

PXRD of Compound I

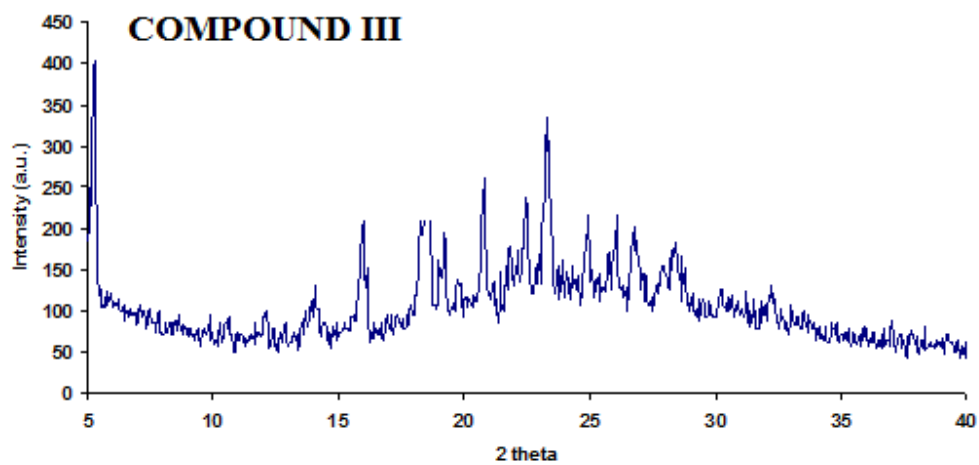

PXRD of Compound III

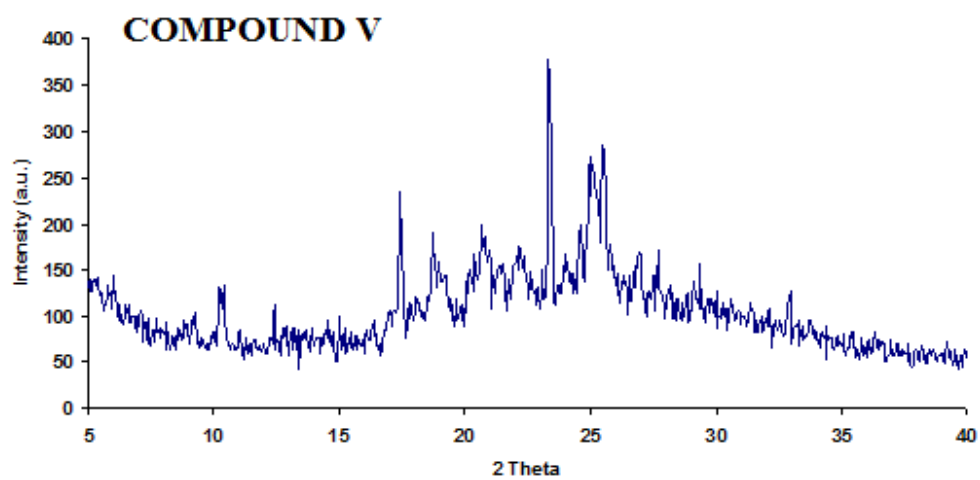

PXRD of compound V
